# Supplementary material
Source: PubMed Central journal article supplement (PMC7190999)

Full unedited Western Blot for Figure 7, upper panel (HSP70)

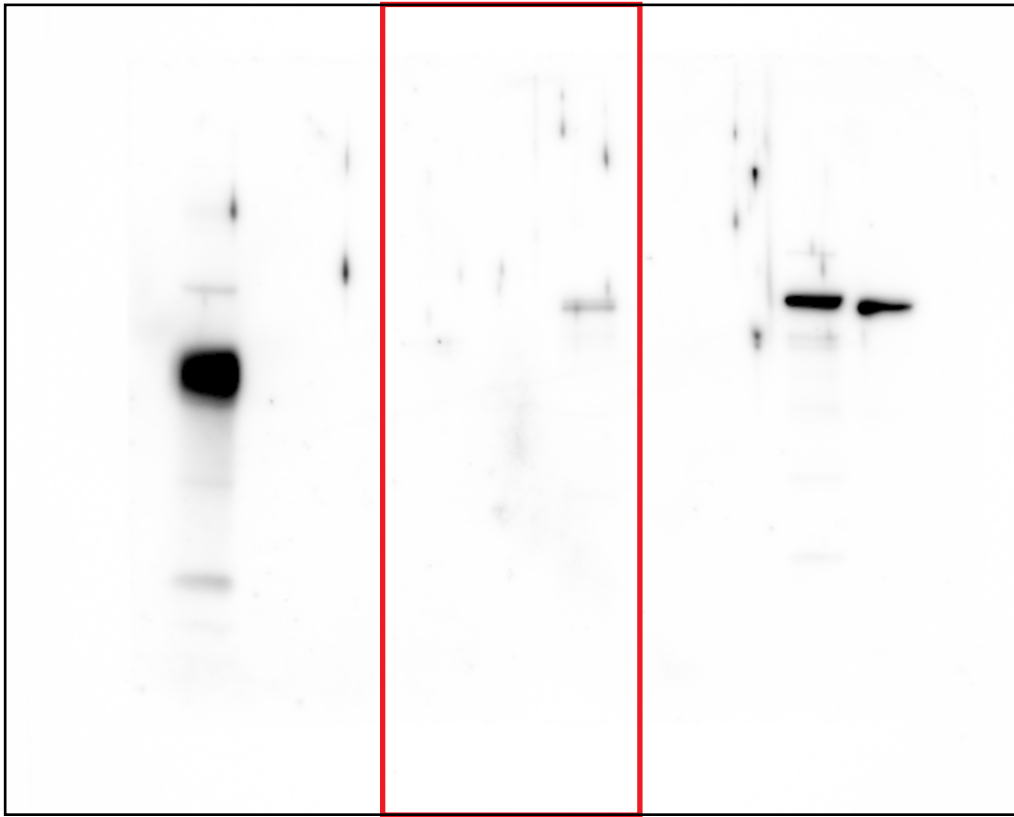

Full unedited Western Blot for Figure 7, lower panel (CD81)

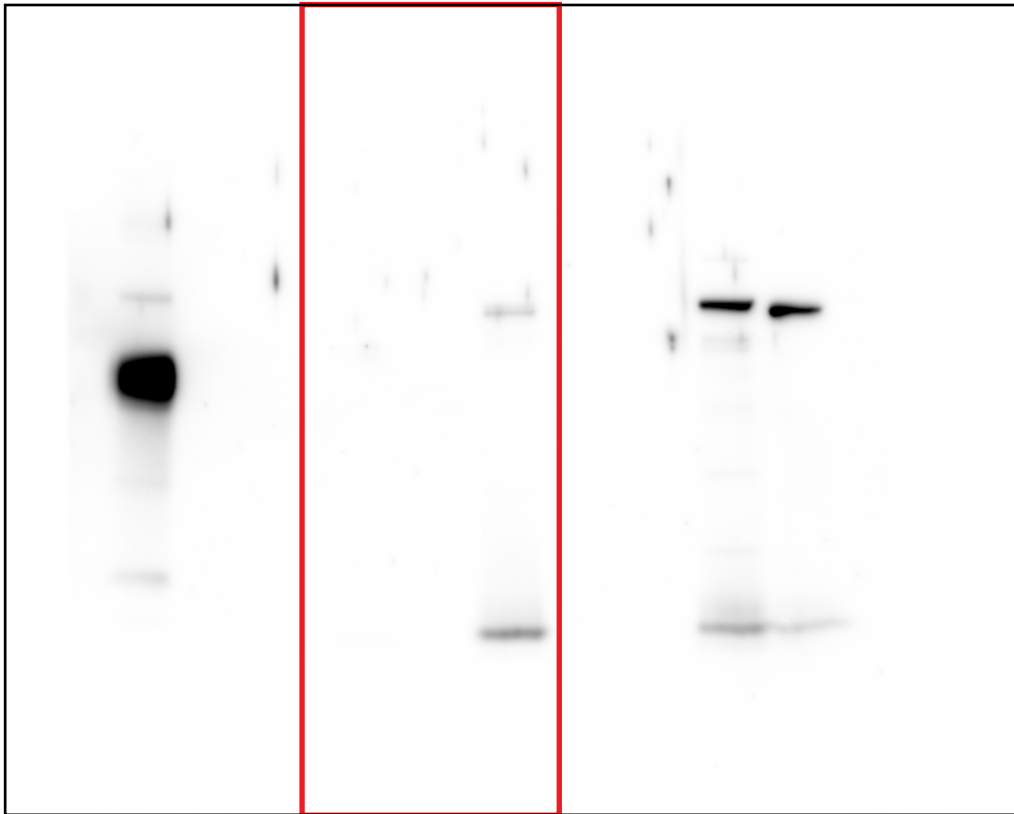

Supplement: jci-130-128867-s419.pdf [file jci-130-128867-s419.pdf]
